# Supplementary material
Source: HighWire-hosted journal article supplement (https://ard.bmj.com/content/suppl/2004/02/17/63.3.226)
Supplement: 633226Appendix2.pdf [file 633226Appendix2.pdf]

## Appendix 2:

### Definitions of hip osteoarthritis used in the literature

#### 1. Kellgren & Lawrence grading system

| <i>Grade</i> | <i>Description</i>                                                                                                                                |
|--------------|---------------------------------------------------------------------------------------------------------------------------------------------------|
| 0            | No osteoarthritis                                                                                                                                 |
| 1            | Doubtful<br>Possible narrowing of joint space medially and possible osteophytes around femoral head; or osteophytes alone                         |
| 2            | Mild<br>Definite narrowing of joint space inferiorly, definite osteophytes and slight sclerosis                                                   |
| 3            | Moderate<br>Marked narrowing of joint space, definite osteophytes, some sclerosis and cyst formation and deformity of femoral head and acetabulum |
| 4            | Severe<br>Gross loss of joint space with sclerosis and cysts, marked deformity of femoral head and acetabulum and large osteophytes               |

Hips classified as grade 2 or higher were defined as having OA

#### 2. Croft's modification of the Kellgren & Lawrence grading system ("Croft grade")

| <i>Grade</i> | <i>Description</i>                                                                                                       |
|--------------|--------------------------------------------------------------------------------------------------------------------------|
| 0            | No change                                                                                                                |
| 1            | Definite osteophytes only                                                                                                |
| 2            | Joint space narrowing (JSN) only (defined as an MJS of $\leq 2.5 \clubsuit$ mm)                                          |
| 3            | Presence of 2 of the following: JSN, osteophytosis, subchondral sclerosis (of $\geq 5 \clubsuit$ mm), and cyst formation |

| <i>Grade</i> | <i>Description</i>                                                                                                   |
|--------------|----------------------------------------------------------------------------------------------------------------------|
| 4            | Presence of 3 of the following: JSN, osteophytosis, subchondral sclerosis (of $\geq 5$ ♣mm), and cyst formation      |
| 5            | Same as grade 4, but with deformity of the femoral head or total hip replacement due to OA (verified by record view) |

3. Croft's measurement of the "minimal joint space" (lateral, superior, axial, medial)

Minimal joint space (MJS) is the shortest distance on the radiograph between the femoral head margin and the acetabular edge.

| <i>Grade</i> | <i>Description</i>                |
|--------------|-----------------------------------|
| 0            | MJS $>2.5$ ♣mm                    |
| 1            | MJS $>1.5$ ♣mm and $\leq 2.5$ ♣mm |
| 2            | MJS $\leq 1.5$ ♣mm                |

4. Resnick and Niwayama measurement of the joint space (superior, axial and medial)

| <i>Grade</i> | <i>Description</i> |
|--------------|--------------------|
| 0            | MJS $>3.5$ ♣mm     |
| 1            | MJS $\leq 3.5$ ♣mm |

5. ACR criteria

| <b>ACR 1</b>                                                          | <b>ACR 2</b>                                                                            | <b>ACR 3</b>                                                                                    |
|-----------------------------------------------------------------------|-----------------------------------------------------------------------------------------|-------------------------------------------------------------------------------------------------|
| Clinical criteria<br><br>(Classification tree format)<br><br>Hip pain | Combined Clinical and Radiographic Criteria<br><br>(Traditional format)<br><br>Hip pain | Combined Clinical and Radiographic Criteria<br><br>(Classification tree format)<br><br>Hip pain |

| ACR 1                                                                                                                                              | ACR 2                                                                                                                                            | ACR 3                                                                       |
|----------------------------------------------------------------------------------------------------------------------------------------------------|--------------------------------------------------------------------------------------------------------------------------------------------------|-----------------------------------------------------------------------------|
| + Hip internal rotation <math><15^\circ</math> and ESR $\leq 45 \clubsuit$ mm/h (if ESR not available, hip flexion $\leq 115^\circ$ ) OR           | + at least 2 of the following 3 features:                                                                                                        | + Radiographic femoral and/or acetabular osteophytes OR                     |
| + Hip internal rotation $\geq 15^\circ$ and pain on internal rotation and morning stiffness of the hip $\leq 60 \clubsuit$ min and age $>50$ years | ESR $<20 \clubsuit$ mm/h<br>Radiographic femoral or acetabular osteophytes<br>Radiographic joint space narrowing (superior, axial and/or medial) | + ESR $\leq 20 \clubsuit$ mm/h and radiographic axial joint space narrowing |

ESR, one-hour erythrocyte sedimentation rate.

6. Clinical osteoarthritis of the hip: positive radiological osteoarthritis combined with pain in the hip region

Hip pain with joint space narrowing (JSN):

- Superior JSN  $<3.5 \clubsuit$  mm **and/or**
- Axial JSN  $<2.5 \clubsuit$  mm

7. Radiographic index grade according to Lane

Table width=A

| <i>Grade</i> | <i>Description</i>                                                                                                                     |
|--------------|----------------------------------------------------------------------------------------------------------------------------------------|
| 0            | Normal (no findings of OA)                                                                                                             |
| 1            | Possible osteophytes (IRF grade 1) and/or narrowing (IRF grade 1), or isolated definite osteophytes or narrowing (IRF grade $\geq 2$ ) |

---

| <i>Grade</i> | <i>Description</i>                                                                                 |
|--------------|----------------------------------------------------------------------------------------------------|
| 2            | Definite osteophytes or narrowing (IRF grade $\geq 2$ ) plus cysts or sclerosis                    |
| 3            | 3 of the following: definite osteophytes or narrowing (IRF grade $\geq 2$ ),<br>cysts or sclerosis |
| 4            | Grade 3 (as above) plus femoral head deformity                                                     |

---

Number of IRF (Individual Radiographic Features) scores that correspond to

0=normal, 1=mild, 2=moderate, 3=severe.
